# Supplementary material
Source: Research Square preprint supplement (doi:10.21203/rs.3.rs-9034594/v1)
Supplement: Supplementary file 1 [file 1ffa44952e591c81ea71effd.docx]

**Survey on Academic and Professional Integrity Cognition among Undergraduates at Kunming Medical University**

**【Instructions & Introductory Remarks】**

**Dear Student of Kunming Medical University:**

Greetings!

We are the ["Research Integrity and Teachers' Ethics" Research Group] from the School of Pharmacy at Kunming Medical University. We are conducting an anonymous survey research project regarding the cognition of academic integrity and professional ethics among undergraduate students in medical, pharmaceutical, and nursing majors at our university2.

This study aims to gain a deep understanding of the current status, cognition, and key influencing factors of academic integrity and future professional ethics among our undergraduates. The goal is to provide solid data support for the university to optimize educational resources and foster a better academic and teaching atmosphere3.

**【Important Statement】**

1. **Completely Anonymous:** This questionnaire **does NOT** collect your name, student ID, or any personally identifiable information. All data will be used solely for statistical analysis in aggregate form. Please feel free to answer candidly4.
2. **Voluntary Participation:** Your participation is entirely voluntary5.
3. **Honest Answers:** There are no "right" or "wrong" answers; we only care about your true views and feelings. Your honesty is crucial to this study6.

Completing this questionnaire is expected to take **8-10 minutes**7.

Thank you for your valuable time and support! 8

**[ ] I have read all the above information, understand it, and agree to participate in this anonymous survey.** *(Please check to start)* 9

**Part A: Basic Background Information (Demographics)**

*(Note: These are "Grouping Variables" or "Covariates" for subsequent statistical analysis)* 10

A1. Your Major: [Major] 11○ Clinical Medicine (including 5-year, 8-year programs, etc.) 12○ Basic Medicine 13○ Pharmacy (including Clinical Pharmacy, Pharmacy Administration, etc.) 14○ Nursing (including Midwifery) 15○ Public Health and Preventive Medicine 16○ Stomatology 17○ Forensic Medicine 18○ Other (Please specify: __________) 19

A2. Your Current Year of Study: [Year] 20○ Freshman (Year 1) 21○ Sophomore (Year 2) 22○ Junior (Year 3) 23○ Senior (Year 4) 24○ Year 5 25

A3. Your Gender: [Gender] 26○ Male 27○ Female 28

A4. Your Current Academic Performance (GPA or Comprehensive Ranking) is roughly in the: [GPA] 29○ Top 10% of the major 30○ 10% - 30% of the major 31○ 30% - 60% of the major 32○ After 60% of the major 33○ Unsure 34

A5. Have you participated in the "Undergraduate Innovation and Entrepreneurship Training Program (SRT)" or joined a tutor's laboratory for research projects? [Research_Experience] 35○ Yes, I have participated 36○ No, I have not participated 37

A6. Your Political Status: [Political_Status] 38○ CPC Member (including Probationary Member) 39○ Communist Youth League Member 40○ The Masses (Non-partisan) 41○ Other 42

Part B: Perceived Environment (Independent Variables - IVs) 43

**【Instructions】** The following statements describe your feelings about the academic integrity environment at the university. Based on your **real experiences** and **intuitive feelings**, please select your level of agreement with each statement44.

**(Scale: 1=Strongly Disagree; 2=Disagree; 3=Neutral/Unsure; 4=Agree; 5=Strongly Agree)** 45

| **No.** | **Item** | **1** | **2** | **3** | **4** | **5** |
| --- | --- | --- | --- | --- | --- | --- |
| **B1: Perceived Institutional Climate** [Institutional_Climate] | | | | | | |
| B1.1 | I am very clear about the university's definitions of academic misconduct such as cheating on exams and plagiarism in papers. 46 | ○ | ○ | ○ | ○ | ○ |
| B1.2 | I believe the university's punishment for academic misconduct is severe and effective. 47 | ○ | ○ | ○ | ○ | ○ |
| B1.3 | I believe the teachers in our university are fair and just in course grading and awards evaluation. 48 | ○ | ○ | ○ | ○ | ○ |
| **B2: Perceived Ethical Environment** [Ethical_Environment] | | | | | | |
| B2.1 | Most teachers in my major are my role models regarding **Professional Ethics** (e.g., Medical Ethics/Pharmaceutical Ethics). 49 | ○ | ○ | ○ | ○ | ○ |
| B2.2 | My teachers actively integrate relevant **Professional Ethics** cases into professional course teaching. 50 | ○ | ○ | ○ | ○ | ○ |
| B2.3 | Most of my classmates hold a contemptuous attitude towards behaviors like exam cheating. 51 | ○ | ○ | ○ | ○ | ○ |
| B2.4 | In my major, the "academic competition pressure (Involution)" is so high that it induces some people to adopt dishonest means. 52 | ○ | ○ | ○ | ○ | ○ |
| **B3: Perceived Educational Efficacy** [Educational_Efficacy] | | | | | | |
| B3.1 | The academic integrity education lectures organized by the university (e.g., at entrance) had a significant impact on me. 53 | ○ | ○ | ○ | ○ | ○ |
| B3.2 | I believe that integrating integrity and ethics education into **Professional Courses** (Curriculum Civics) is more effective than standalone lectures. 54 | ○ | ○ | ○ | ○ | ○ |
| B3.3 | The integrity education activities (e.g., lectures, theme class meetings) carried out by the school (college) are attractive to me. 55 | ○ | ○ | ○ | ○ | ○ |

Part C: Perceived Drivers of Misconduct (IVs or Moderators) 56

**【Instructions】** Below are some reasons that might lead students to commit academic misconduct (e.g., cheating, plagiarism). Please evaluate your **Level of Agreement** with these reasons based on your observations and feelings57.

**(Scale: 1=Strongly Disagree; 2=Disagree; 3=Neutral/Unsure; 4=Agree; 5=Strongly Agree)** 58

| **No.** | **Item** | **1** | **2** | **3** | **4** | **5** |
| --- | --- | --- | --- | --- | --- | --- |
| **C1: Academic Pressure** [Academic_Pressure] | | | | | | |
| C1.1 | The course difficulty is too high; it is hard to pass without "thinking of other ways." 59 | ○ | ○ | ○ | ○ | ○ |
| C1.2 | The pressure from GPA and ranking competition is too great. 60 | ○ | ○ | ○ | ○ | ○ |
| C1.3 | The competition for scholarships, postgraduate recommendations, and awards is too fierce. 61 | ○ | ○ | ○ | ○ | ○ |
| **C2: Opportunity & Low Risk Perception** [Opportunity_Low_Risk] | | | | | | |
| C2.1 | Teacher supervision is lax; cheating or plagiarism is easy to pull off. 62 | ○ | ○ | ○ | ○ | ○ |
| C2.2 | Even if discovered, the punishment received is usually not severe. 63 | ○ | ○ | ○ | ○ | ○ |
| **C3: Peer Rationalization** [Peer_Rationalization] | | | | | | |
| C3.1 | Seeing many people around me doing it, I feel "the law cannot enforce when everyone violates it." 64 | ○ | ○ | ○ | ○ | ○ |
| C3.2 | I think certain courses are "useless" and not worth the time, so copying homework is acceptable. 65 | ○ | ○ | ○ | ○ | ○ |

Part D: Attitudes towards Misconduct (DVs or Mediators) 66

**【Instructions】** Below are some scenarios you might encounter on campus or in future work. Please judge the **"Acceptability"** or **"Severity"** of these behaviors67.

**(Scale D1: 1=Completely Unacceptable; 2=Unacceptable; 3=Neutral/Unsure; 4=Acceptable; 5=Completely Acceptable)** 68

| **No.** | **Academic Scenarios [Attitude_Academic]** | **1** | **2** | **3** | **4** | **5** |
| --- | --- | --- | --- | --- | --- | --- |
| D1.1 | During an exam, Student A goes to the restroom and uses a mobile phone to peek at review materials inside. 69 | ○ | ○ | ○ | ○ | ○ |
| D1.2 | When writing a course paper, Student B copies large paragraphs from 3 different online articles and patches them together into their own paper. 70 | ○ | ○ | ○ | ○ | ○ |
| D1.3 | Student C's experimental data is not ideal. To make the report "look good," they fabricate/modify several key data points. 71 | ○ | ○ | ○ | ○ | ○ |
| D1.4 | Student F missed a class because they overslept and asked a roommate to sign in for them on the attendance sheet. 72 | ○ | ○ | ○ | ○ | ○ |

**(Scale D2: 1=Not Serious At All; 2=Not Serious; 3=Neutral/Unsure; 4=Serious; 5=Very Serious)** 73

| **No.** | **Professional Scenarios [Attitude_Professional]** | **1** | **2** | **3** | **4** | **5** |
| --- | --- | --- | --- | --- | --- | --- |
| D2.1 | **(Privacy)** An intern posts a photo of a medical record on WeChat Moments (name covered, but diagnostic info visible). 74 | ○ | ○ | ○ | ○ | ○ |
| D2.2 | **(Informed Consent)** An intern doctor, eager to get off work, asks a patient's family to "just sign quickly" on a surgery consent form without explaining the risks in detail. 75 | ○ | ○ | ○ | ○ | ○ |
| D2.3 | **(Conflict of Interest - Pharmacy)** A pharmacist, when facing a patient consultation, prioritizes recommending a brand-name drug with a higher commission, rather than a generic drug with the same efficacy but lower price. 76 | ○ | ○ | ○ | ○ | ○ |
| D2.4 | **(Data Authenticity)** A pharmacy student interning at a pharmaceutical factory finds that test data for a batch of drugs is "borderline" non-compliant, and the supervising teacher asks them to "tweak" the data to make it pass. 77 | ○ | ○ | ○ | ○ | ○ |

Part E: Misconduct Behaviors (Final DVs) 78

**【Instructions】** The following questions are very sensitive but crucial to the research. We **reiterate our promise** that your answers are **100% completely anonymous**. Data is used for statistics only and will never be disclosed. Please be sure to recall and answer **honestly**79.

**(Scale: 1=Never; 2=Only 1-2 times; 3=Several times a semester; 4=Several times a month; 5=Several times a week or more frequently)** 80

| **No.** | **Item** | **1** | **2** | **3** | **4** | **5** |
| --- | --- | --- | --- | --- | --- | --- |
| **E1: Observed "Peer" Behaviors** [Observed_Peer_Behavior] | | | | | | |
| E1.1 | According to your observation, what is the frequency of **classmates around you** cheating in exams (including online/offline)? 81 | ○ | ○ | ○ | ○ | ○ |
| E1.2 | According to your observation, what is the frequency of **classmates around you** submitting course papers/reports containing plagiarism or patchwork? 82 | ○ | ○ | ○ | ○ | ○ |
| E1.3 | According to your observation, what is the frequency of **classmates around you** fabricating or "beautifying" data in lab classes? 83 | ○ | ○ | ○ | ○ | ○ |
| **E2: "Self-Reported" Behaviors** [Self_Reported_Behavior] | | | | | | |
| *【Before answering, please confirm again that you are aware this survey is completely anonymous】* | | | | | | |
| E2.1 | In the past year, what is the frequency of **yourself** obtaining answers through improper means in exams (including online/offline)? 84 | ○ | ○ | ○ | ○ | ○ |
| E2.2 | In the past year, what is the frequency of **yourself** having "improper citations" or "large paragraph copy-pasting" in submitted course papers/reports? 85 | ○ | ○ | ○ | ○ | ○ |
| E2.3 | In the past year, what is the frequency of **yourself** fabricating or "beautifying" data in lab classes because the results were not ideal? 86 | ○ | ○ | ○ | ○ | ○ |

Part F: Perceived Efficacy of Interventions (Policy Variables) 87

**【Instructions】** To improve the academic integrity and professional ethics literacy of undergraduates, the university and college can take various measures. Please evaluate the **"Effective Degree"** you think the following measures might achieve88.

**(Scale: 1=Completely Ineffective; 2=Ineffective; 3=Neutral/Unsure; 4=Effective; 5=Very Effective)** 89

| **No.** | **Item** | **1** | **2** | **3** | **4** | **5** |
| --- | --- | --- | --- | --- | --- | --- |
| **F1: Deterrence & Policy** [Intervention_Deterrence] | | | | | | |
| F1.1 | Introducing stricter plagiarism checking and proctoring technologies (e.g., AI monitoring). 90 | ○ | ○ | ○ | ○ | ○ |
| F1.2 | Increasing the severity of punishment for academic misconduct (e.g., linking it to degree conferral). 91 | ○ | ○ | ○ | ○ | ○ |
| **F2: Integration & Education** [Intervention_Integration] | | | | | | |
| F2.1 | Integrating more real ethical case discussions into professional courses (Curriculum Civics). 92 | ○ | ○ | ○ | ○ | ○ |
| F2.2 | Inviting outstanding role models from clinical/industry sectors (e.g., famous doctors/pharmacists) to share professional ethics. 93 | ○ | ○ | ○ | ○ | ○ |
| F2.3 | Conducting "Scenario Simulation" teaching (like the questions you did in "Part D"). 94 | ○ | ○ | ○ | ○ | ○ |
| **F3: Culture & Atmosphere** [Intervention_Culture] | | | | | | |
| F3.1 | Senior students sharing integrity experiences to establish "Peer Mentoring." 95 | ○ | ○ | ○ | ○ | ○ |
| F3.2 | Publicly commending role models of academic integrity more often (rather than just punishing the negative ones). 96 | ○ | ○ | ○ | ○ | ○ |

**【Closing Remarks】**

**The questionnaire ends here.** 97

Thank you again for your honest answers and valuable time! Your participation is of great significance to this research98.

We promise to strictly abide by the principle of anonymity, handle all data properly, and are committed to using the research results to improve our university's academic atmosphere and ethics education system99.

**We wish you academic progress and a bright future!** 100
